# Supplementary material for: Combining microdialysis sampling and inductively coupled plasma mass spectrometry for dynamic monitoring of trace metal ions during bacterial growth periods
Source: Royal Society of Chemistry journal article supplement (doi:10.1039/c4ra07941h), 2014-10-03
Supplement: c4ra07941h1.pdf [file c4ra07941h1.pdf]

Supporting Information

Table A1. *In vitro* NNF data for the concentrations of various elements in TSB medium.

| Element | Slope | Intercept | Regression coefficient |
|---------|-------|-----------|------------------------|
| Cd      | 0.86  | 0.31      | 0.9990                 |
| Co      | 0.74  | 2.10      | 0.9991                 |
| Cu      | 1.24  | 4.42      | 0.9977                 |
| Sr      | 0.84  | 12.28     | 0.9983                 |
| Pb      | 0.65  | 0.91      | 0.9952                 |

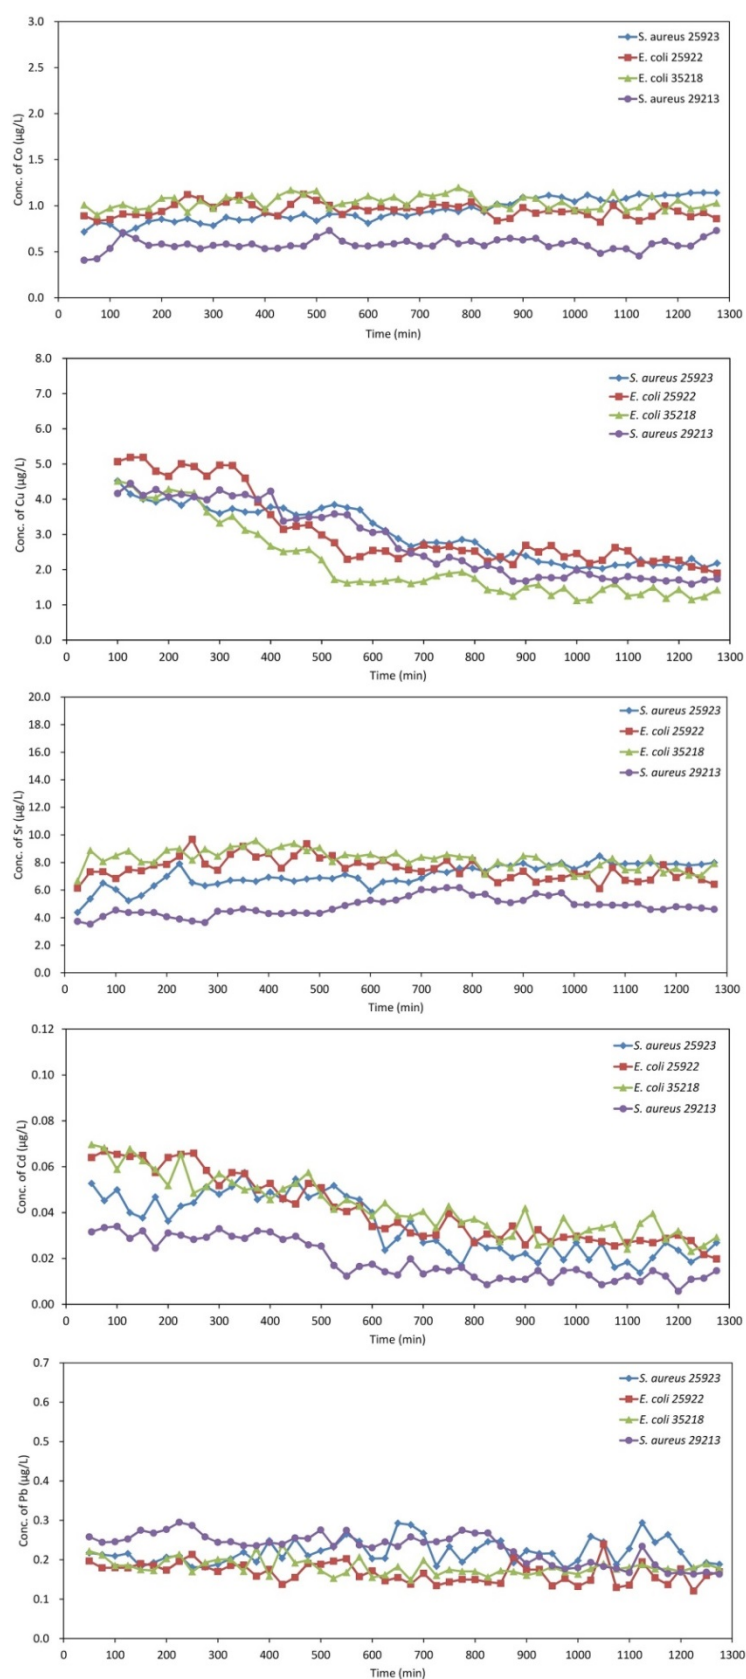

Figure A1. Variations in concentrations of metal ions during bacterial growth in inoculated TSB solutions, as determined using the proposed MD/ICP-MS system.
